# Supplementary material for: Axon-specific microtubule regulation drives asymmetric regeneration of sensory neuron axons
Source: eLife journal article supplement (doi:10.7554/elife.104069), 2024-11-29
Supplement: fig4-data1 [file elife-104069-fig4-data1-v1.zip]

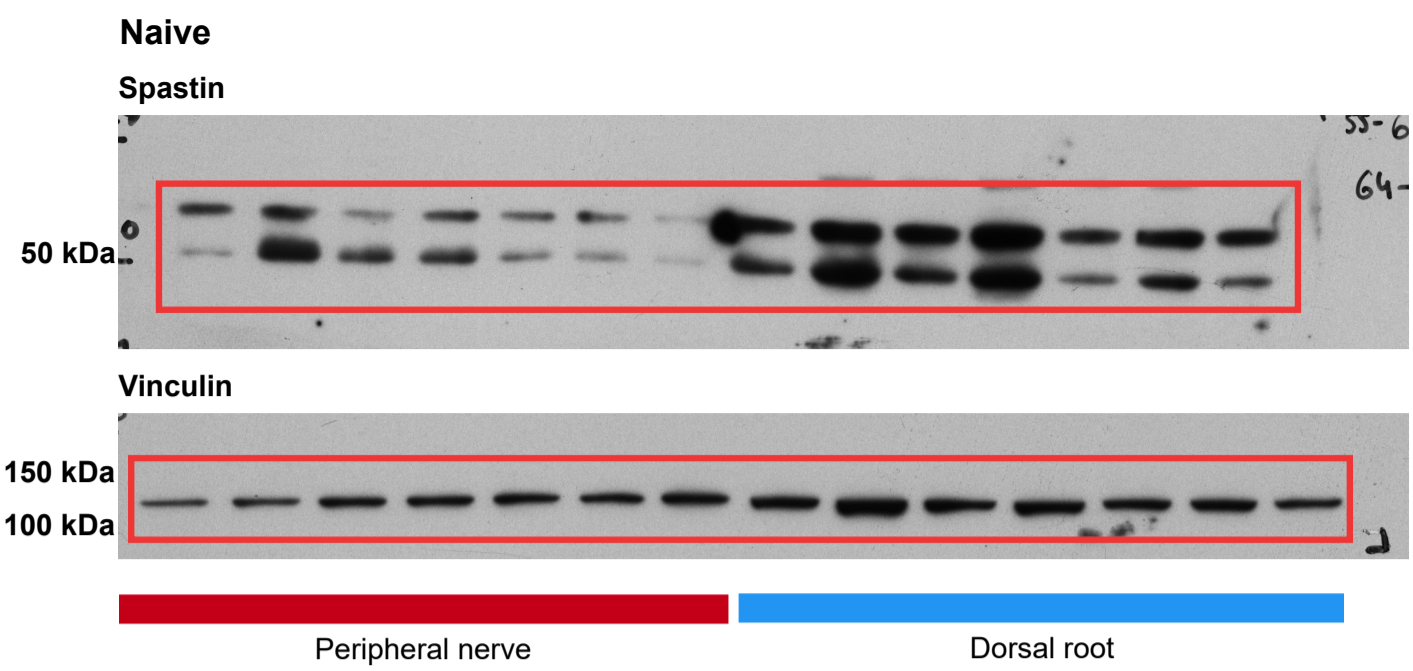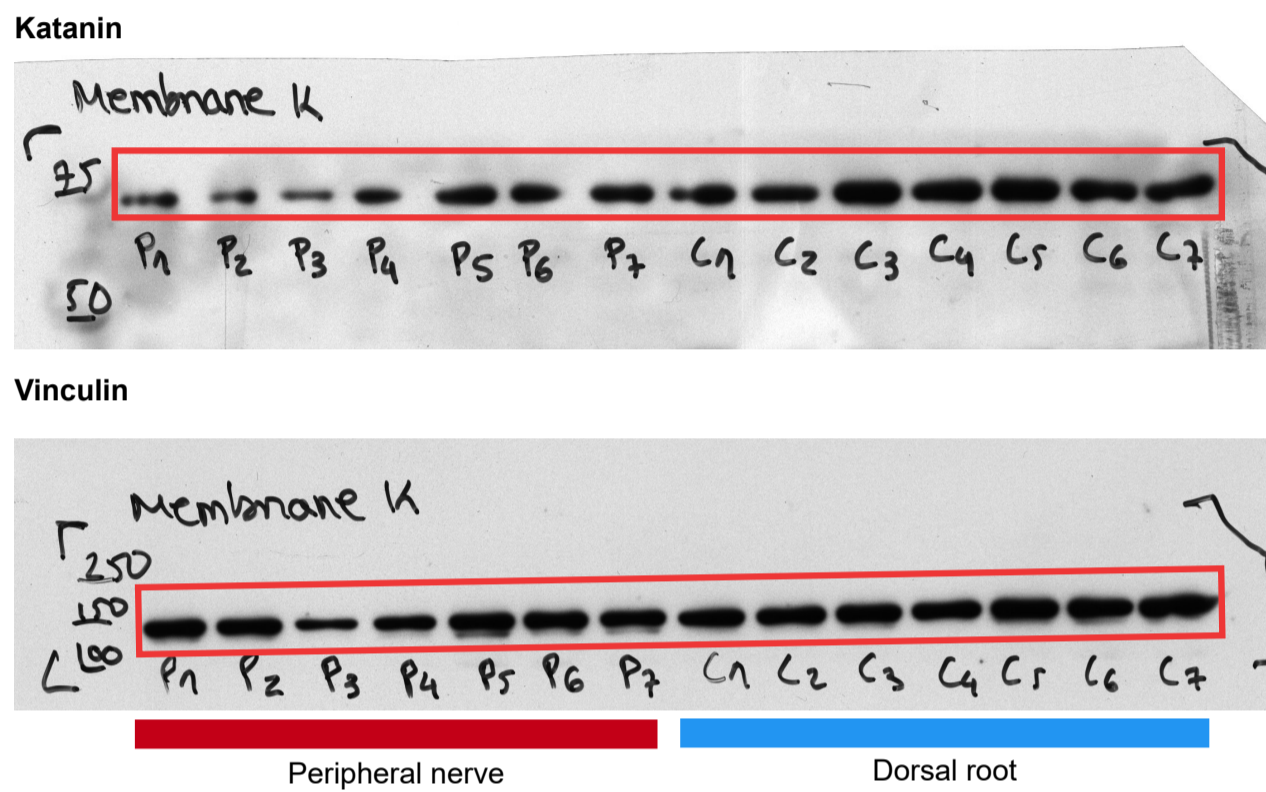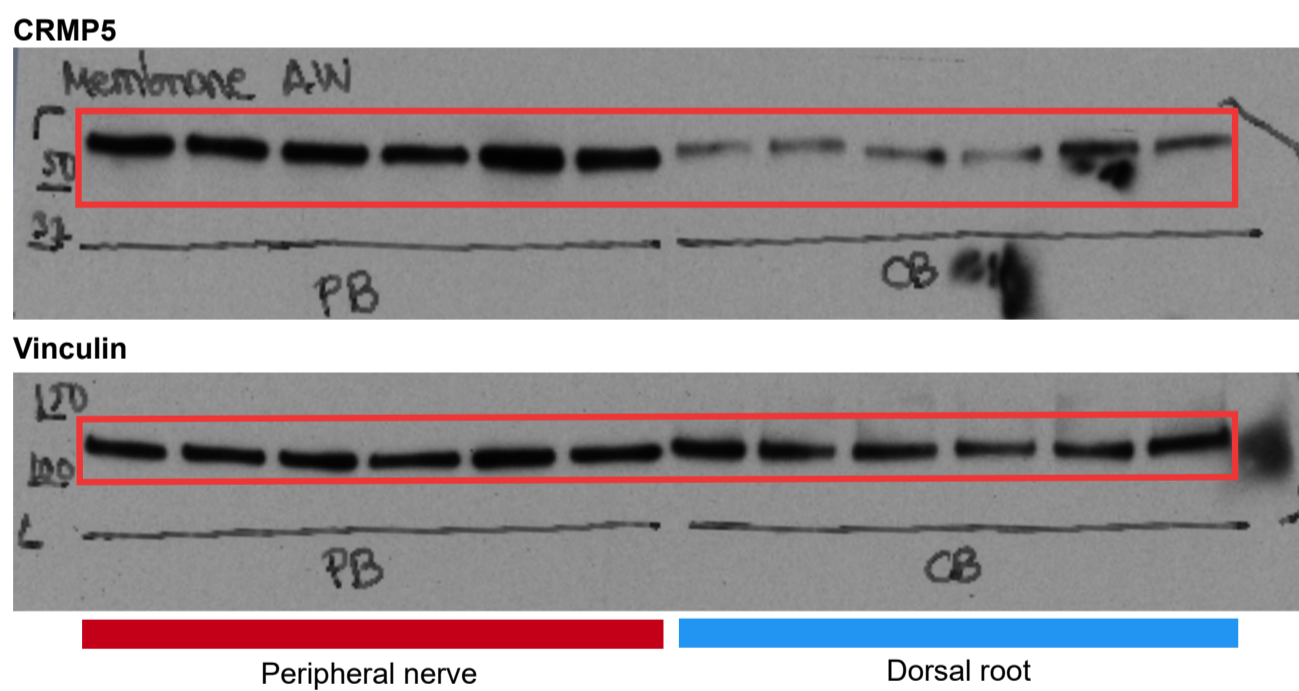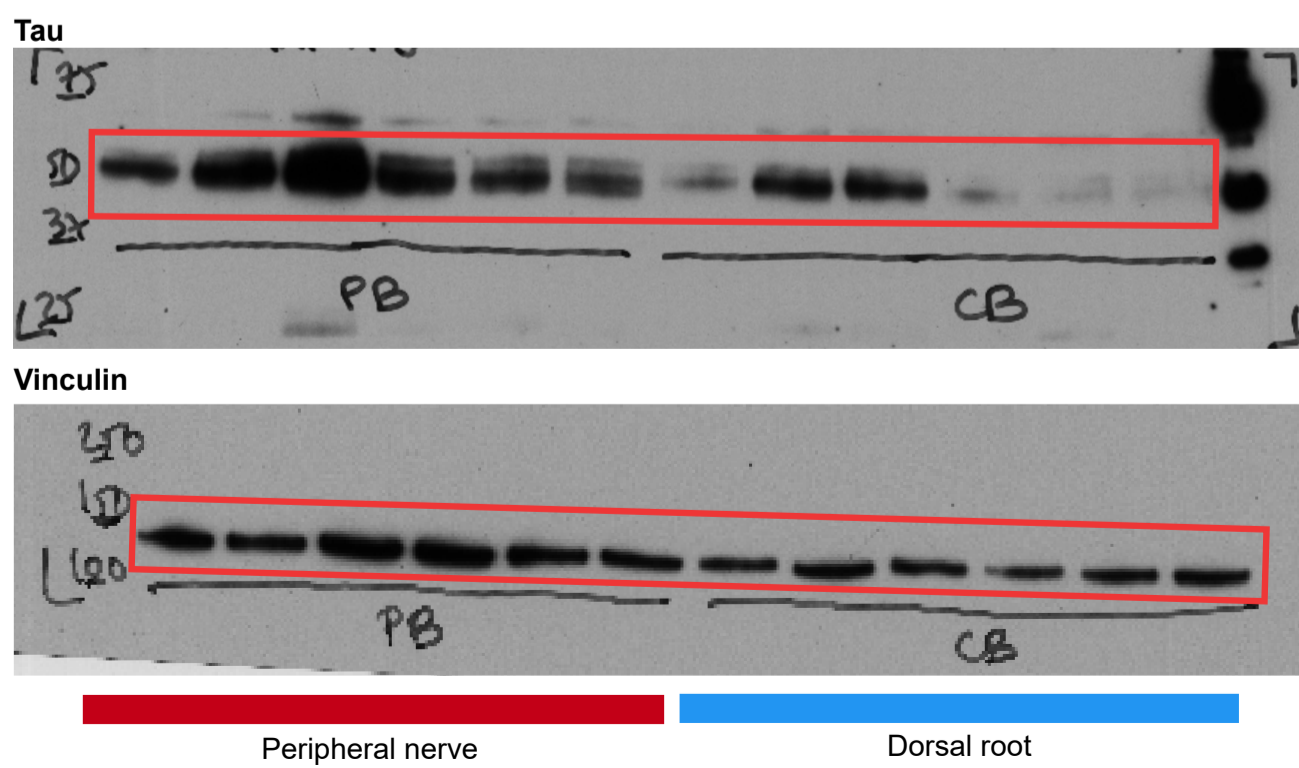

## Conditioning lesion

Spastin

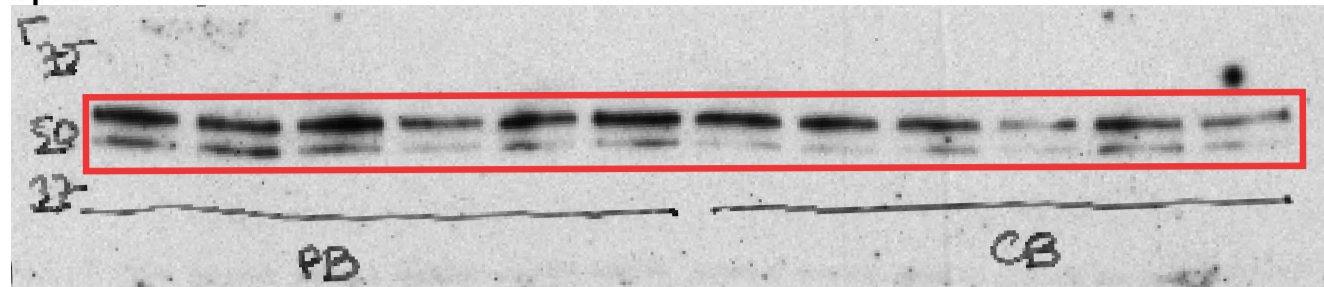

Vinculin

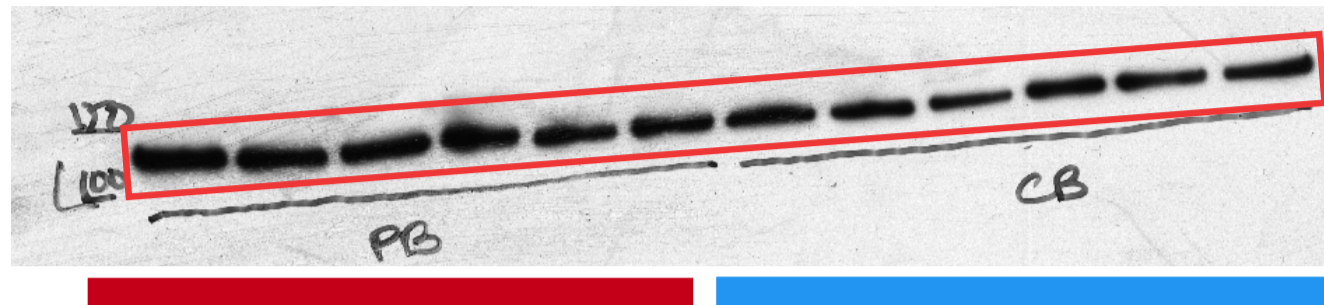

Peripheral nerve

Dorsal root

Katanin

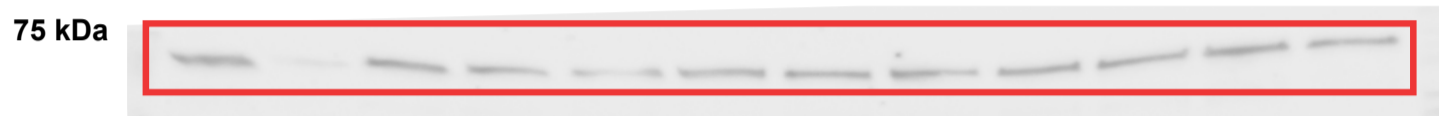

Vinculin

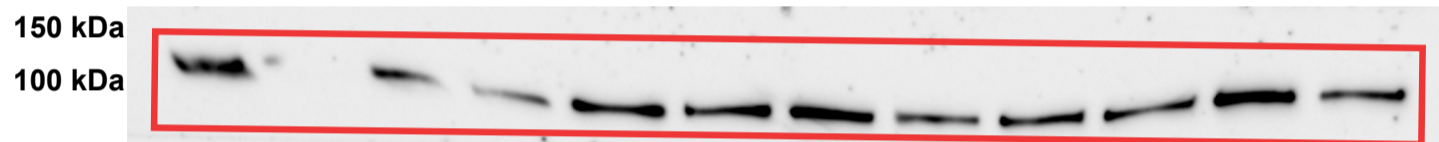

Peripheral nerve

Dorsal root

CRMP5

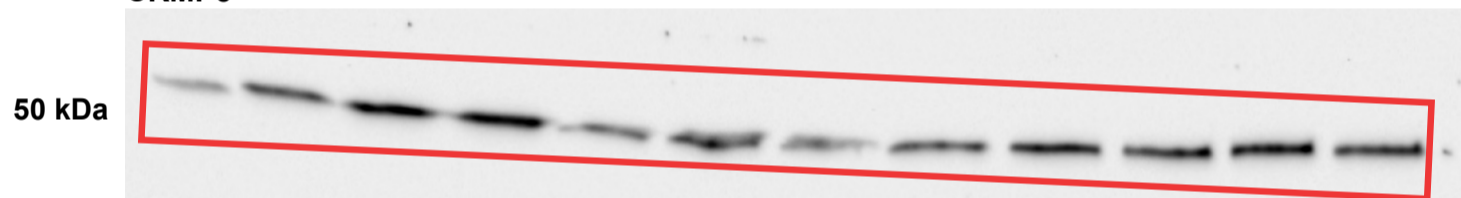

Vinculin

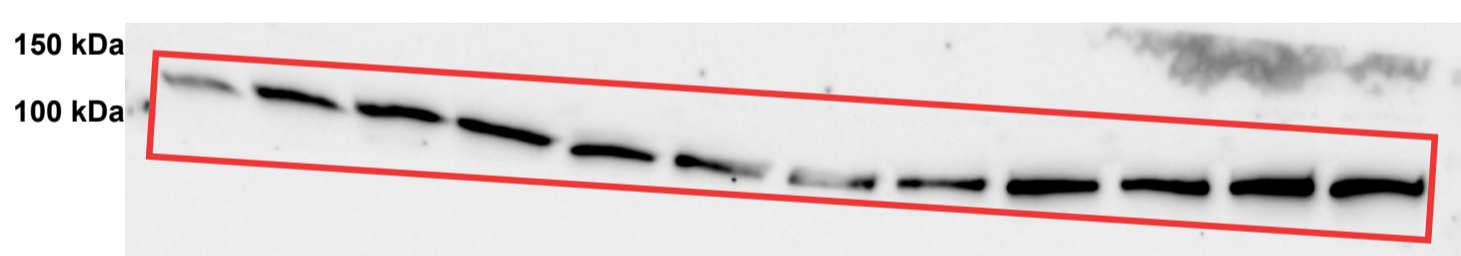

Peripheral nerve

Dorsal root

Tau

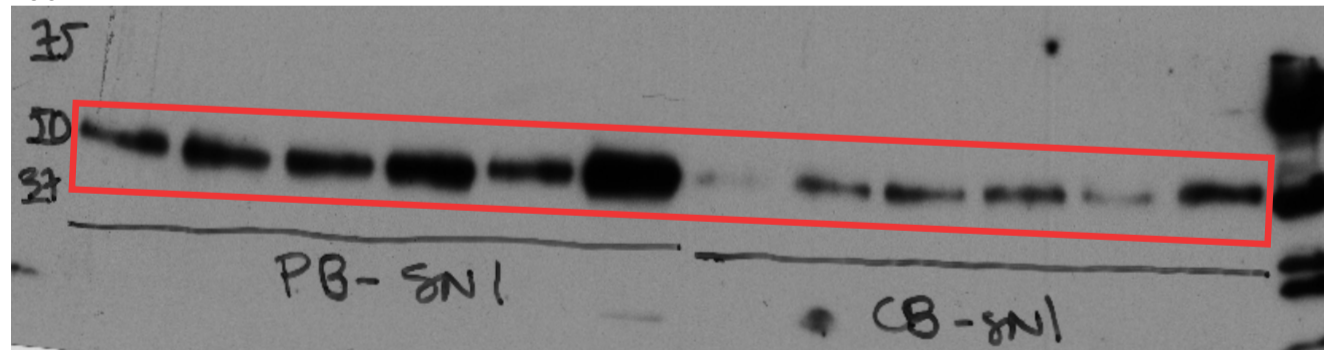

Vinculin

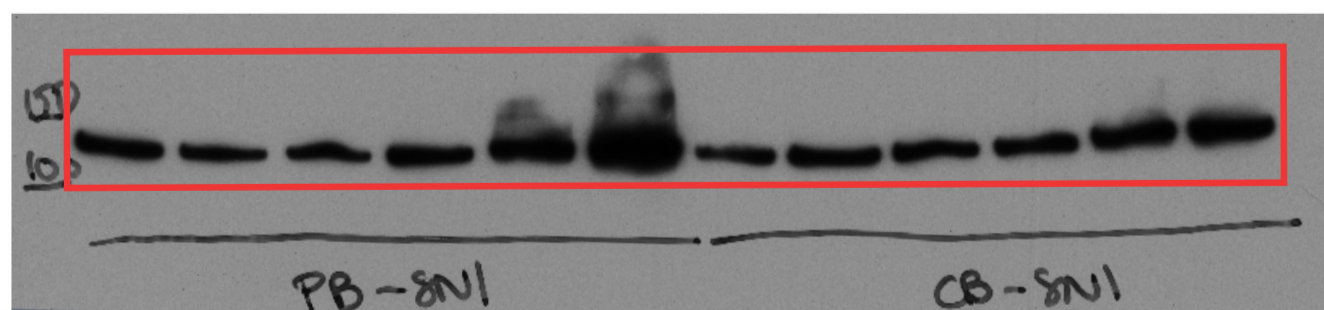

Peripheral nerve

Dorsal root

**Figure 4, source data 3.** Original membranes corresponding to Figure 4, panel B-E (naive) and J-M (conditioning lesion). Microtubule-associated proteins (MAPs), including spastin, katanin, tau and CRMP5 levels, in DRG peripheral nerve and dorsal root. Vinculin was used as a house-keeping protein. Molecular weights written on the left hand side.
