# Supplementary material for: Axon-specific microtubule regulation drives asymmetric regeneration of sensory neuron axons
Source: eLife journal article supplement (doi:10.7554/elife.104069), 2024-11-29
Supplement: fig4-figsupp1-data1 [file elife-104069-fig4-figsupp1-data1-v1.zip]

**Tyrosinated tubulin**

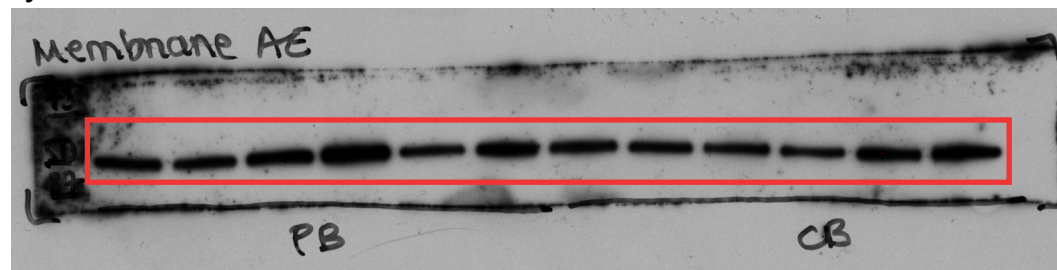

**Vinculin**

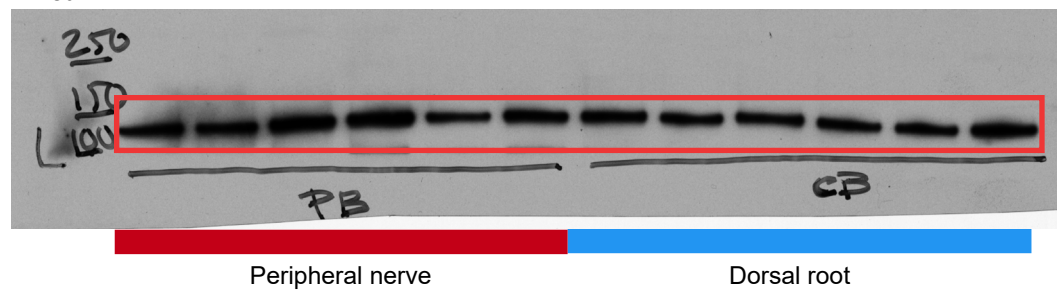

**Acetylated tubulin**

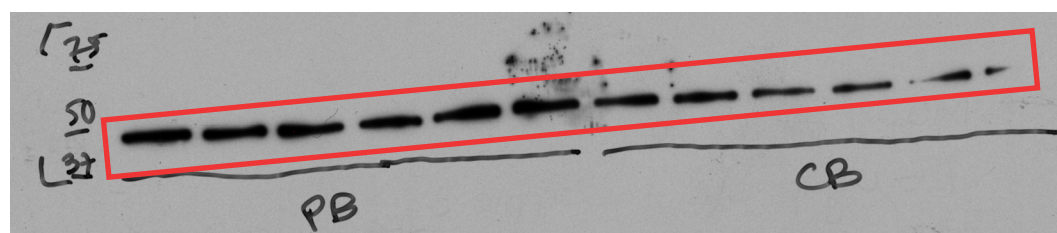

**Vinculin**

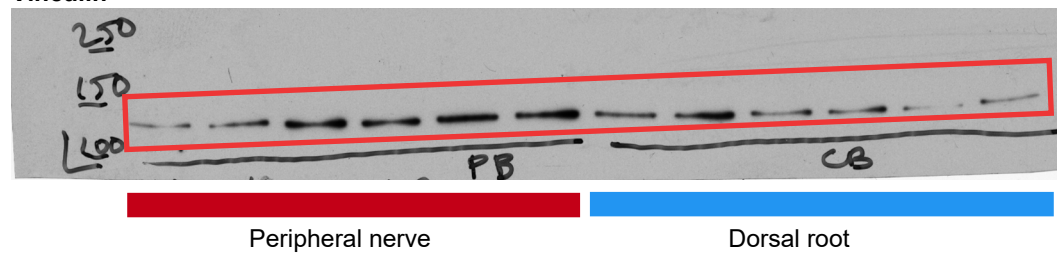

**Delta2 tubulin**

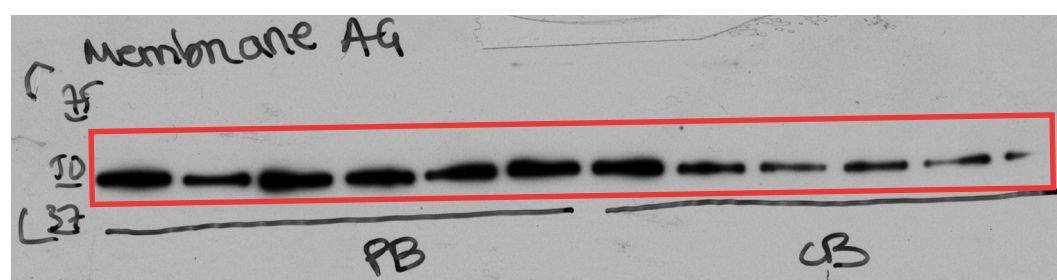

**Vinculin**

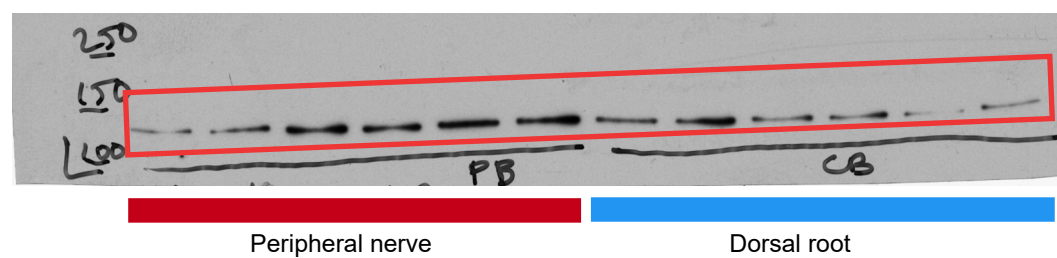

**Polyglutamylated tubulin**

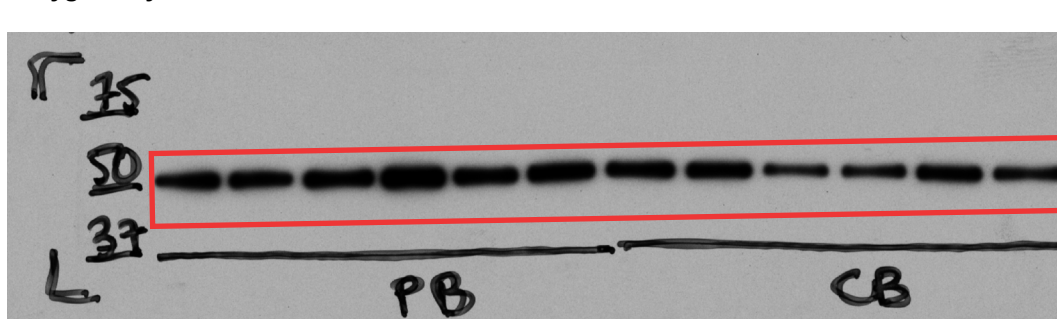

**Vinculin**

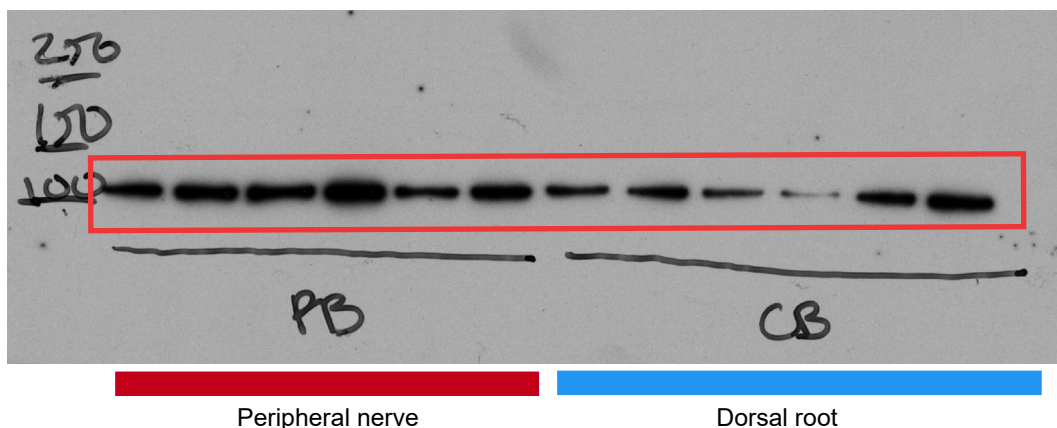

**Figure 4, figure supplement 1, source data 1.** Original membranes corresponding to Figure 4, figure supplement 1. Tubulin post-translational modifications, including tyrosinated, acetylated, delta2, and polyglutamylated tubulin levels, in DRG peripheral nerve and dorsal root. Vinculin was used as a housekeeping protein. Molecular weights written on the left hand side.
